# Supplementary figures and images for: Community Antibiotic Consumption in Cyprus for the Period 2015 to 2022
Source: MDPI journal article supplement (doi:10.3390/antibiotics13010052), 2024-01-04

Antibiotic consumption (packages per inhabitant) by year in Cyprus

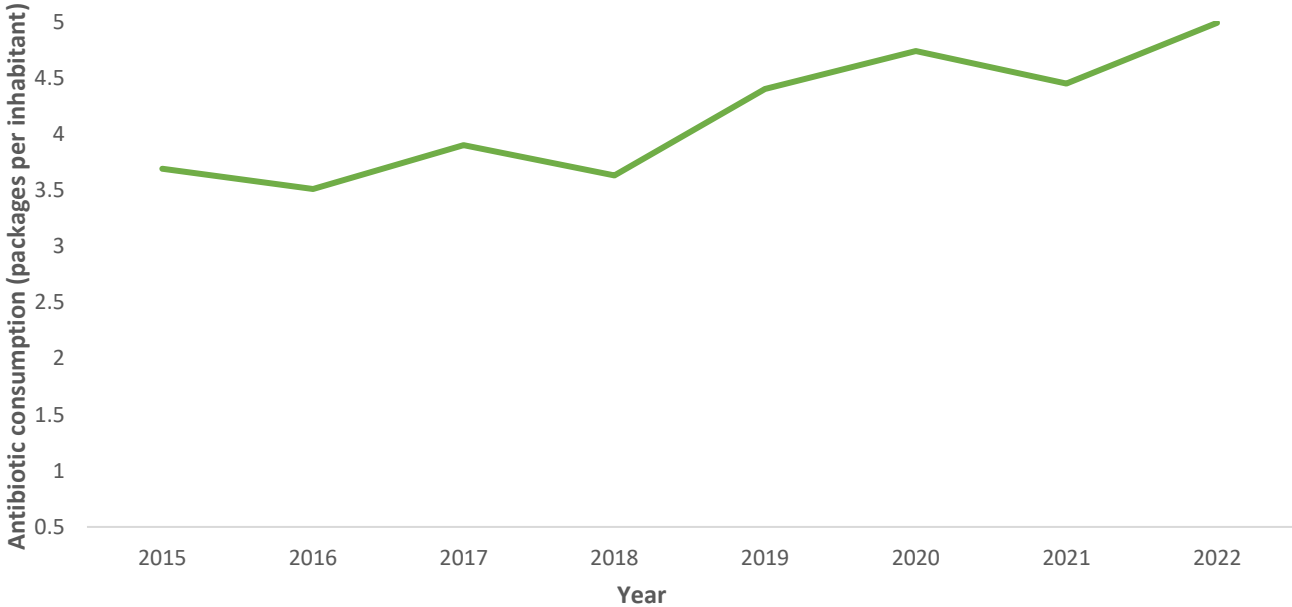

Supplement: s1 [file s1]
